# Supplementary material for: Serologic Prevalence of Toxoplasma gondii in Indian Women of Child Bearing Age and Effects of Social and Environmental Factors
Source: PubMed Central journal article supplement (PMC3967963; doi:10.1371/journal.pntd.0002737), 2014-03-27
Supplement: pntd.0002737.s001.pdf [file pntd.0002737.s001.pdf]

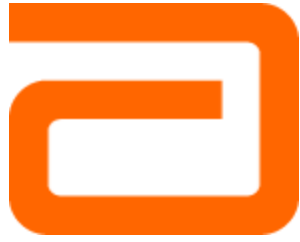

Centre code:

## **Clinical Investigation Proforma**

# **Sero-epidemiology of toxoplasmosis in women of child bearing age in India**

**Phase of study: - Epidemiological study**

Date \_\_\_\_/\_\_\_\_/\_\_\_\_

Participant ID -----

If attending any hospital: Reg. No. -----OPD-----Medical Reason-----

Name \_\_\_\_\_ Age (Yrs) \_\_\_\_\_

Father/Husband's name \_\_\_\_\_

Address \_\_\_\_\_ City \_\_\_\_\_ State \_\_\_\_\_

Contact No (s) \_\_\_\_\_

Marital status : Single  Married

**Education**

Illiterate  Matric  Graduate  Post Graduate  Doctorate/ Professional course

Occupation: - Yes  No

If Yes kindly mention: \_\_\_\_\_

**Socio-Economic Level**

Low  Medium  High

**Eating Habits:**

Vegetarian  Non-Vegetarian

**If Non-Vegetarian:**

Beef  Mutton  Pork  Poultry  Fish

Frequency of consumption of meat: \_\_\_\_\_

**Accommodation:**

Pucca  Kachcha  Mud hut  Tent

**Pets:** No  Yes

| Type of animal                | Exposure Date | Exposure Location | City / State |
|-------------------------------|---------------|-------------------|--------------|
| <input type="checkbox"/> Bird |               |                   |              |
| <input type="checkbox"/> Cat  |               |                   |              |
| <input type="checkbox"/> Dog  |               |                   |              |
| Other pet Specify<br>_____    |               |                   |              |

**Exposure Details:**

Farming  Gardening with bare hand/foot  Eating raw salads  Raw meat

Regarding Raw salad, please specify:

Carrot  Radish  Beet Root  Cauliflower  Celery  Cabbage  Cucumber

**Drinking Water Sources:**

Tap Water  Hand pump  Tube well/well  Spring water  Filtered  River Water

**Drinking Milk**

Boiled  Pasteurized

**Obstetric history:**

If Married: Non-Pregnant  Pregnant  LMP: \_\_\_\_\_

**HIV status:** Positive  Negative  Duration \_\_\_\_\_

**Corticosteroids:** Yes  NO

**History of Allergy/Allergens:** Yes  NO  Type \_\_\_\_\_

**Trimester of Pregenancy**

First  Second  Third

| <u>Gravida status</u> | <u>Alive (Healthy/Sick)</u><br><u>Please write details</u> | <u>Male/ Female/Aborted</u> | <u>If aborted</u><br><u>SB/ SA/MTP</u> |
|-----------------------|------------------------------------------------------------|-----------------------------|----------------------------------------|
| <u>G1</u>             |                                                            |                             |                                        |
| <u>G2</u>             |                                                            |                             |                                        |
| <u>G3</u>             |                                                            |                             |                                        |
| <u>G4</u>             |                                                            |                             |                                        |
| <u>G5</u>             |                                                            |                             |                                        |
| <u>G6</u>             |                                                            |                             |                                        |

**Laboratory Details**

- Sample collected on (dd/mm/yy) : ...../...../.....
- Sample sent to Department of Clinical Microbiology, AIIMS Delhi on (dd/mm/yy):...../...../.....

***Investigators Signature with date***

**FOR AIIMS USE ONLY**

- Sample Received at DEPARTMENT OF Clinical Microbiology, AIIMS Delhi on (dd/mm/yy) :

...../...../.....

- Test Performed at Department of Clinical Microbiology AIIMS on (dd/mm/yy) :

...../...../.....

**Test Results:**

| Test         | Cut-off value<br>( give lot no. of the<br>kit) | Test value | Interpretation | Signatures of<br>technician |
|--------------|------------------------------------------------|------------|----------------|-----------------------------|
| IgG          |                                                |            |                |                             |
| IgM          |                                                |            |                |                             |
| IgG- avidity |                                                |            |                |                             |

***Authentication with date***

**Prof. Sarman Singh**  
Division of Clinical Microbiology,  
Department of Laboratory Medicine  
All India Institute of Medical Sciences  
Ansari Nagar  
New Delhi
